# Supplementary material for: Tracing the Trans-Pacific Evolutionary History of a Domesticated Seaweed (Gracilaria chilensis) with Archaeological and Genetic Data
Source: PubMed Central journal article supplement (PMC4263469; doi:10.1371/journal.pone.0114039), 2014-12-11
Supplement: pone.0114039.s001.pdf [file pone.0114039.s001.pdf]

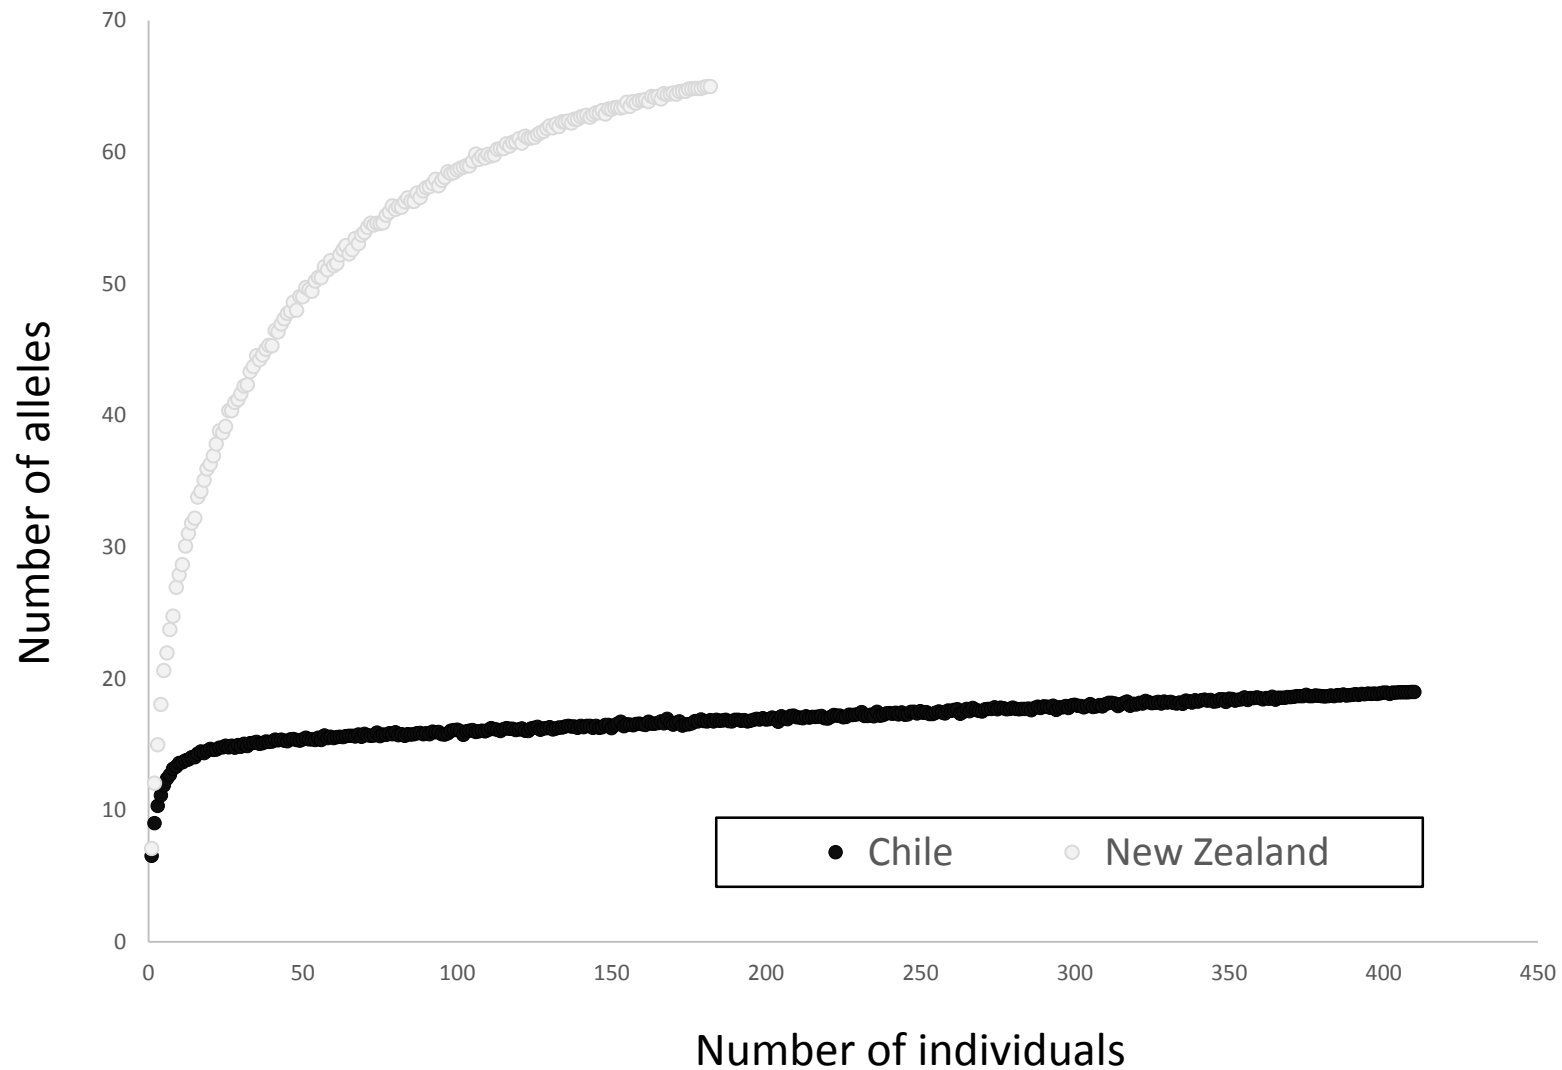

FigureS1: Comparison of allele accumulation curves between Chilean and New Zealand (including Chatham Island) samples.
