# Supplementary material for: Tracing the Trans-Pacific Evolutionary History of a Domesticated Seaweed (Gracilaria chilensis) with Archaeological and Genetic Data
Source: PubMed Central journal article supplement (PMC4263469; doi:10.1371/journal.pone.0114039), 2014-12-11
Supplement: pone.0114039.s002.pdf [file pone.0114039.s002.pdf]

**Table S1:** Sampling locations and diversity measures for microsatellites (5 loci) and ITS2 sequences in *G. chilensis*. N, number of individuals per sampling locations used for microsatellite genotyping; (Ho) observed heterozygosity, (He) expected heterozygosity, Ae, multi-locus estimates of expected allelic richness based on the smallest sample size (20 genes / 10 individuals); Pa: number of private alleles; Weir and Cockerham's [32]  $F_{IS}$  estimate (NS non-significant, \* significant deviation from HW expectation,  $P < 0.0028$ ,  $\alpha = 0.05$ , Bonferroni correction of multiple test with 18 populations); n, number of individuals used for sequencing; nR, number of ribotypes; Re, expected haplotype richness based on the smallest sample size (5 ribotypes); Ribotypes: details of the different ribotypes observed in the populations, private ribotypes are in bold. Mean  $\pm$  SEM are indicated for all New Zealand samples (i.e. Global New Zealand) and all Chilean samples (i.e. Global Chile).

| Population (abbreviation)       | Position              | N  | Microsatellites |    |      |      |                      | ITS2 sequences |    |      |             |
|---------------------------------|-----------------------|----|-----------------|----|------|------|----------------------|----------------|----|------|-------------|
|                                 |                       |    | Ae              | Pa | Ho   | He   | $F_{IS}$             | n              | nR | Re   | Ribotypes   |
| <b>NEW ZEALAND</b>              |                       |    |                 |    |      |      |                      |                |    |      |             |
| <b>West New Zealand</b>         |                       |    |                 |    |      |      |                      |                |    |      |             |
| Whanganui Inlet (NZ-WIN)        | 40° 34' S, 172° 32' E | 25 | 1.84            | 1  | 0.28 | 0.44 | 0.37*                | 11             | 2  | 0.45 | r6, r8      |
| Golden Bay (NZ-PGB)             | 40° 48' S, 172° 48' E | 10 | 2.65            | 3  | 0.39 | 0.56 | 0.35*                | 8              | 2  | 0.62 | r6, r7      |
| Moutere Inlet (NZ-MOU)          | 40° 59' S, 173° 01' E | 30 | 0.86            | 2  | 0.59 | 0.33 | - 0.78*              | 11             | 3  | 0.91 | r6, r9, r10 |
| <b>East New Zealand</b>         |                       |    |                 |    |      |      |                      |                |    |      |             |
| Pautahanui Inlet (NZ-PIW)       | 41° 06' S, 174° 49' E | 32 | 2.32            | 11 | 0.56 | 0.52 | - 0.07 <sup>NS</sup> | 14             | 2  | 0.60 | r1, r4      |
| Scorching Bay (NZ-SCB)          | 41° 18' S, 174° 48' E | 25 | 0.82            | 0  | 0.27 | 0.23 | - 0.18 <sup>NS</sup> | 15             | 3  | 1.18 | r1, r2, r3  |
| Avon-Heathcote estuary (NZ-CAH) | 43° 36' S, 172° 45' E | -  | -               | -  | -    | -    | -                    | 5              | 2  | 1.00 | r1, r4      |
| Stewart Island (NZ-STI)         | 46° 54' S, 168° 07' E | 30 | 1.97            | 7  | 0.50 | 0.48 | - 0.02 <sup>NS</sup> | 17             | 2  | 0.29 | r1, r5      |
| <b>Chatham Island</b>           |                       |    |                 |    |      |      |                      |                |    |      |             |
| Chatham Island (NZ-CHT)         | 43° 52' S, 176° 33' W | 30 | 1.86            | 6  | 0.19 | 0.49 | 0.62*                | 12             | 7  | 2.74 |             |

|                              |                      |     |                |       |                |                |                      |    |    |             | r1, r11, r12,<br>r13, r14, r15,<br>r16 |
|------------------------------|----------------------|-----|----------------|-------|----------------|----------------|----------------------|----|----|-------------|----------------------------------------|
| <b>GLOBAL NEW ZEALAND</b>    |                      | 182 | 1.76 ±<br>0.69 | 49/69 | 0.40 ±<br>0.16 | 0.44 ±<br>0.12 | 0.21*                | 93 | 16 | 0.97 ± 0.77 | 15/21                                  |
| <b>CHILE</b>                 |                      |     |                |       |                |                |                      |    |    |             |                                        |
| <b>Araucanian region</b>     |                      |     |                |       |                |                |                      |    |    |             |                                        |
| Dichato (CH-DIC)             | 36° 45' S, 73° 11' W | 43  | 1.29           | 0     | 0.32           | 0.38           | 0.17 <sup>NS</sup>   | 13 | 2  | 0.64        | r1, r21                                |
| Lenga (CH-LEN)               | 36° 32' S, 72° 56' W | 19  | 1.32           | 0     | 0.41           | 0.39           | - 0.02 <sup>NS</sup> | 9  | 2  | 0.56        | r1, r17                                |
| Tubul (CH-TUB)               | 37° 15' S, 73° 26' W | 28  | 1.72           | 0     | 0.54           | 0.58           | 0.10 <sup>NS</sup>   | 9  | 3  | 1.11        | r1, r20, r21                           |
| <b>Valdivia river región</b> |                      |     |                |       |                |                |                      |    |    |             |                                        |
| Molinos (CH-MOL)             | 39° 50' S, 73° 23' W | 49  | 0.63           | 0     | 0.30           | 0.23           | - 0.28*              | 12 | 2  | 0.84        | r1, r18                                |
| Niebla (CH-NIE)              | 39° 52' S, 73° 23' W | 72  | 0.44           | 0     | 0.13           | 0.13           | 0.00 <sup>NS</sup>   | 9  | 1  | 0.00        | r1                                     |
| <b>Austral region</b>        |                      |     |                |       |                |                |                      |    |    |             |                                        |
| Metri (CH-MET)               | 41° 36' S, 72° 42' W | 41  | 0.65           | 1     | 0.37           | 0.30           | - 0.24 <sup>NS</sup> | 8  | 2  | 0.62        | r1, r21                                |
| Mauillin (CH-MAU)            | 41° 37' S, 73° 35' W | 43  | 1.26           | 0     | 0.48           | 0.46           | - 0.04 <sup>NS</sup> | 7  | 2  | 0.71        | r1, r19                                |
| Ancud (CH-ANC)               | 41° 52' S, 73° 48' W | 22  | 1.23           | 0     | 0.31           | 0.36           | 0.17 <sup>NS</sup>   | 9  | 2  | 0.56        | r1, r21                                |
| Hornopiren (CH-HOR)          | 41° 58' S, 72° 28' W | 34  | 0.69           | 0     | 0.19           | 0.26           | 0.27*                | 12 | 2  | 0.68        | r1, r21                                |

|                     |                      |     |                |      |                |                |                     |     |   |             |      |
|---------------------|----------------------|-----|----------------|------|----------------|----------------|---------------------|-----|---|-------------|------|
| Chaiten (CH-CTE)    | 42° 55' S, 72° 42' W | 12  | 0.63           | 0    | 0.23           | 0.20           | -0.14 <sup>NS</sup> | 9   | 1 | 0.00        | r1   |
| Raul Marin (CH-RMA) | 43° 46' S, 72° 57' W | 47  | 0.60           | 0    | 0.24           | 0.25           | 0.06 <sup>NS</sup>  | 11  | 1 | 0.00        | r1   |
| <b>GLOBAL CHILE</b> |                      | 410 | 0.95 ±<br>0.42 | 4/69 | 0.32 ±<br>0.12 | 0.32 ±<br>0.13 | 0.04 <sup>NS</sup>  | 108 | 6 | 0.52 ± 0.37 | 5/21 |
